# Supplementary material for: Cationic Dye Removal Using Novel Magnetic/Activated Charcoal/β-Cyclodextrin/Alginate Polymer Nanocomposite
Source: PubMed Central journal article supplement (PMC7023446; doi:10.3390/nano10010170), 2020-01-18
Supplement: nanomaterials-10-00170-s001.pdf [file nanomaterials-10-00170-s001.pdf]

## Supplementary Materials:

# Cationic Dye Removal Using Novel Magnetic/Activated Charcoal/ $\beta$ -Cyclodextrin/Alginate Polymer Nanocomposite

Sushma Yadav <sup>1</sup>, Anupama Asthana <sup>1</sup>, Rupa Chakraborty <sup>1</sup>, Bhawana Jain <sup>1</sup>,  
Ajaya Kumar Singh <sup>1,\*</sup>, Sónia A. C. Carabineiro <sup>2</sup> and Md. Abu Bin Hassan Susan <sup>3</sup>

<sup>1</sup> Department of Chemistry, Govt. V.Y.T. PG Autonomous College, Durg 491001, India; sushmabhilai80@gmail.com (S.Y.); anurakeshbhilai@gmail.com (A.A.); roopachakraborty1991@gmail.com (R.C.); bhawanajain123@gmail.com (B.J.)

<sup>2</sup> Centro de Química Estrutural, Instituto Superior Técnico, Universidade de Lisboa, Av. Rovisco Pais 1, 1049-001 Lisboa, Portugal; sonia.carabineiro@tecnico.ulisboa.pt

<sup>3</sup> Department of Chemistry, University of Dhaka, Dhaka 1000, Bangladesh; susan@du.ac.bd

\* Corresponding: ajayaksingh\_au@yahoo.co.in; Tel.: +91-9406207572; Fax: +91-788-2211688

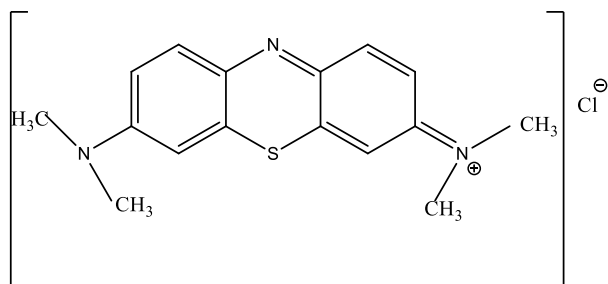

**Figure S1. (A)** The chemical structure of Methylene Blue Dye.

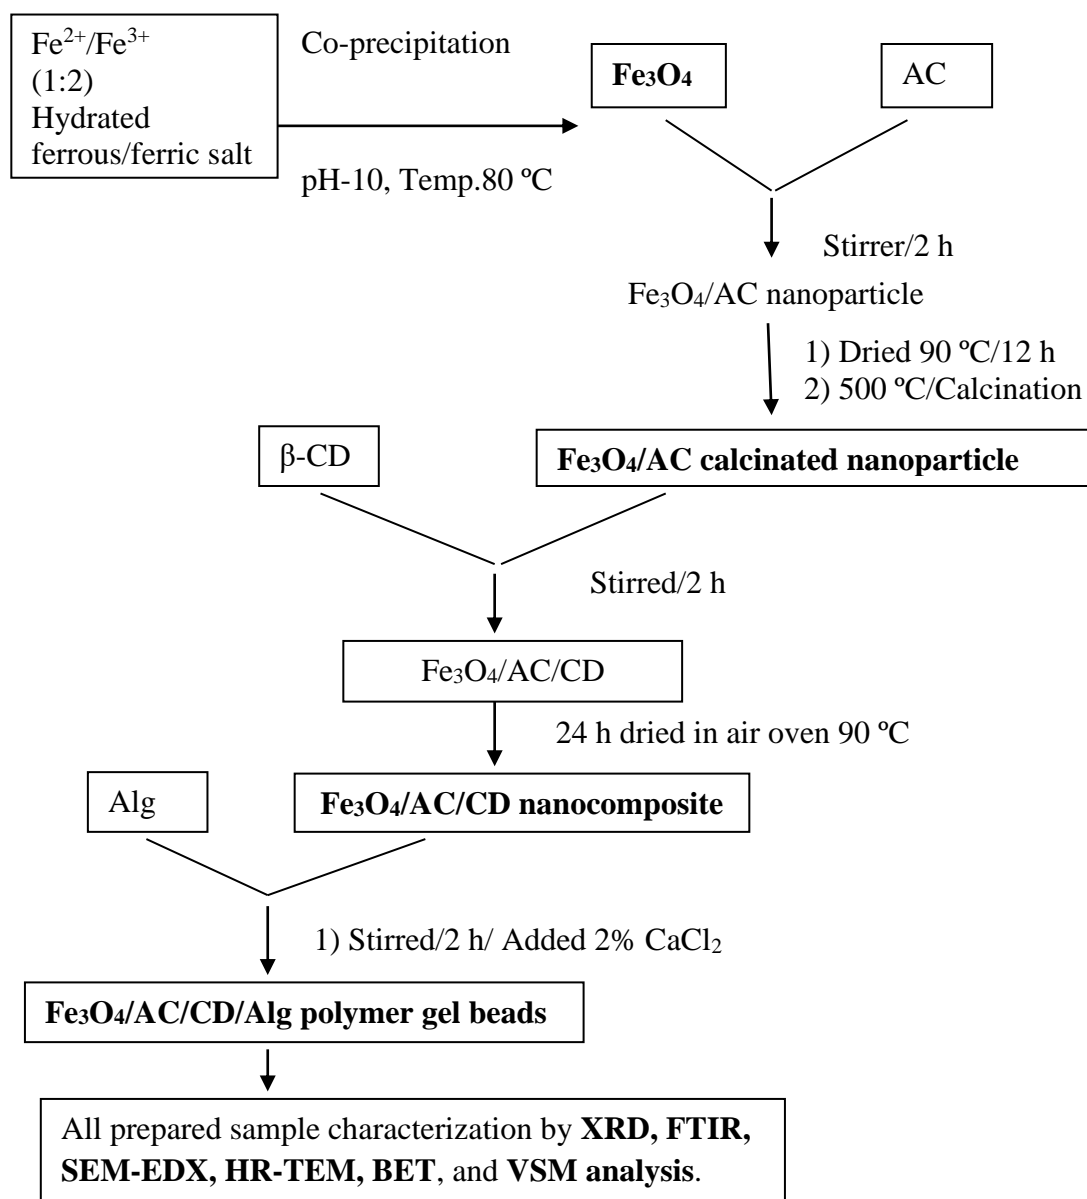

**Figure S1. (B)** Scheme outlining all the steps involved in the synthesis of Fe<sub>3</sub>O<sub>4</sub> /AC, Fe<sub>3</sub>O<sub>4</sub>/AC/CD and Fe<sub>3</sub>O<sub>4</sub>/AC/CD/Alg nanocomposite from preparation to analysis.

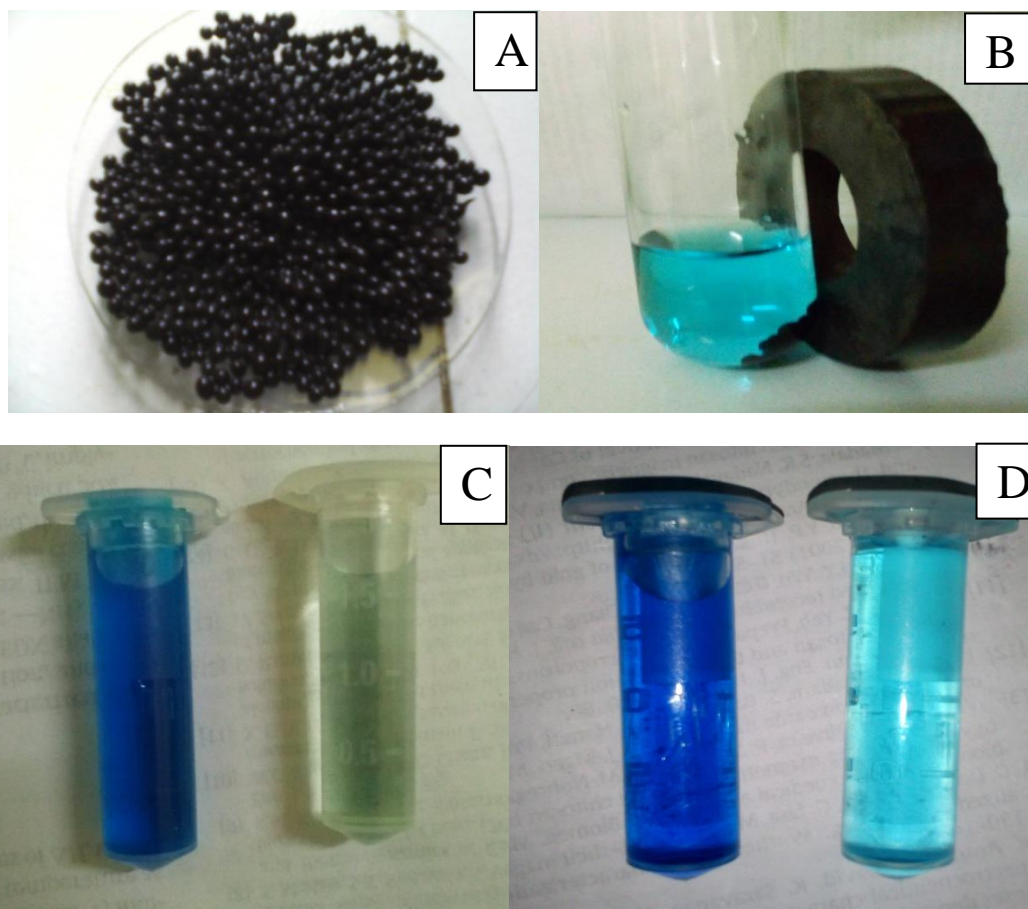

**Figure S2.** (A)  $\text{Fe}_3\text{O}_4/\text{AC}/\text{CD}/\text{Alg}$  polymer gel beads (B) image of  $\text{Fe}_3\text{O}_4/\text{AC}/\text{CD}/\text{Alg}$  nanocomposite attracted by a magnet (C) Before and after adsorption of MB solution by dry powder beads and (D) polymer gel beads.

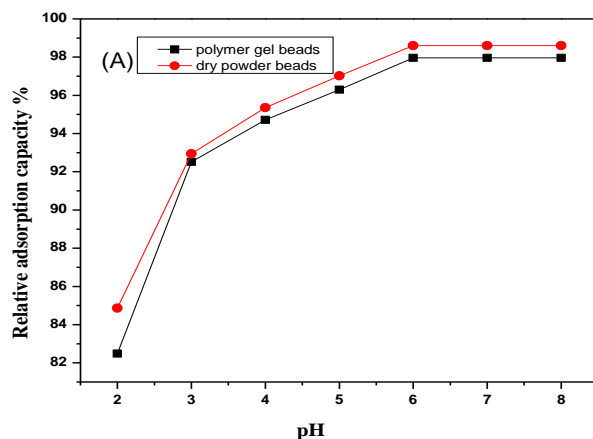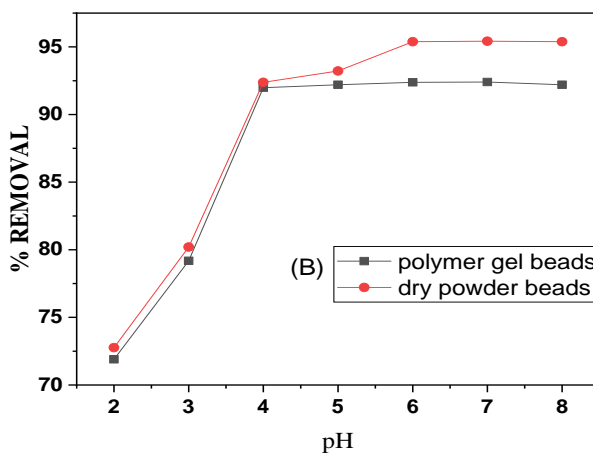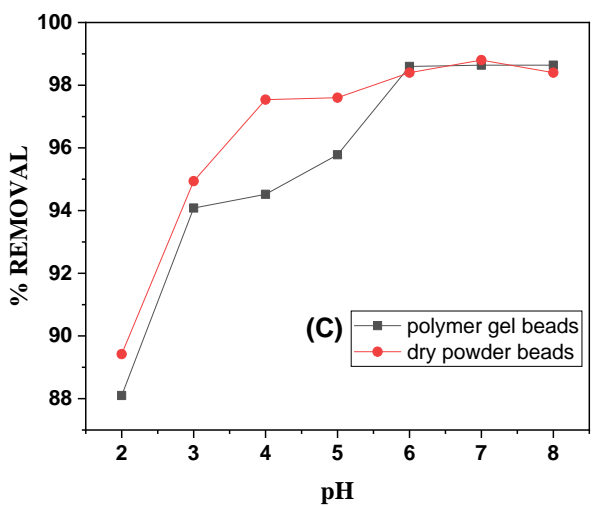

**Figure S3.** Effect of the dye solution pH range from 2 to 8 on the amount of dye adsorption capacity (initial dye concentration = 5 ppm, dosage  $\text{Fe}_3\text{O}_4/\text{AC}/\text{CD}/\text{Alg}$  polymer beads = 0.2 g/10ml dye solution, agitation speed = 150 rpm, room temperature), with contact time = 90 min (A), 60 min (B) and 120 min (C).

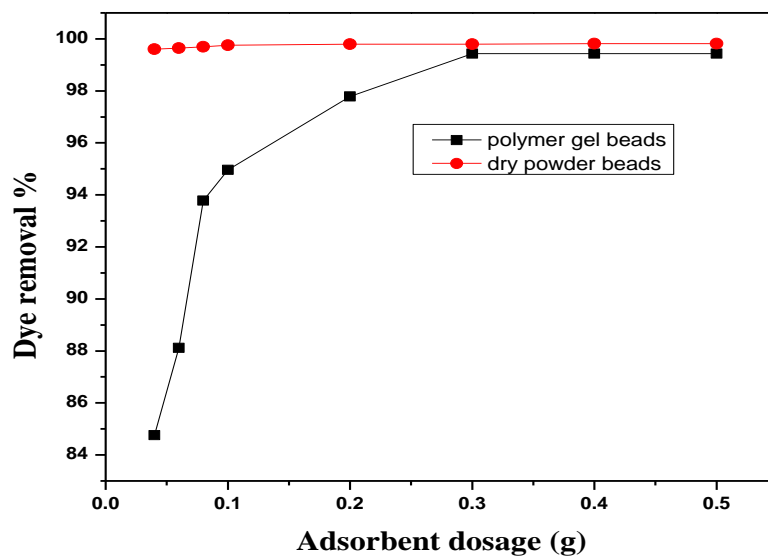

**Figure S4. (A)** Effect of adsorbent dosage on the adsorption of MB by polymer gel beads and dry powder beads (mass of catalyst= 0.04–0.5 g, pH= 6).

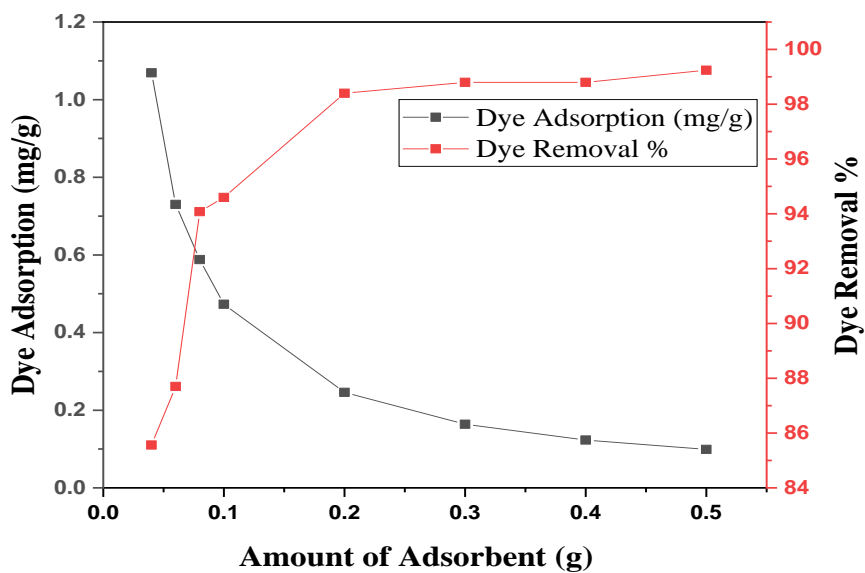

**Figure S4. (B)** Effect of adsorbent dosage on the adsorption capacity and % removal of MB for  $\text{Fe}_3\text{O}_4/\text{AC}/\text{CD}/\text{Alg}$  polymer beads (initial dye concentration = 5 ppm, pH = 6, contact time = 90 min).

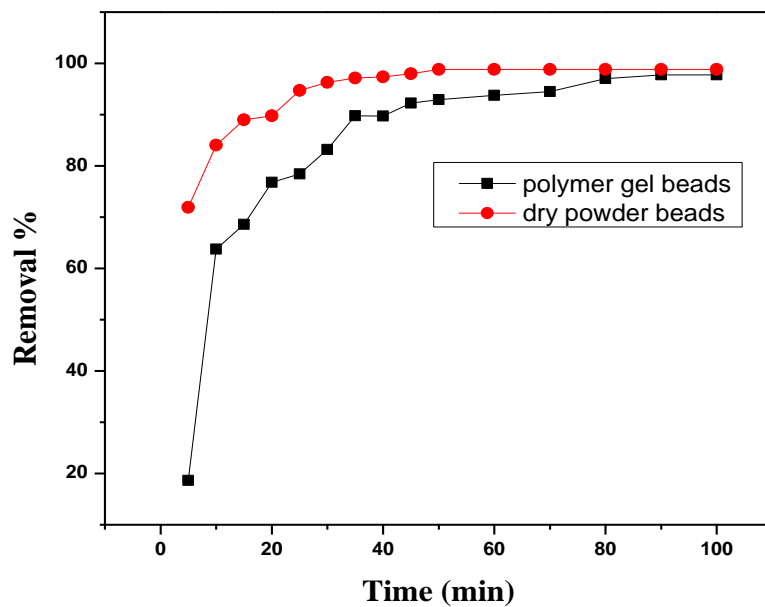

**Figure S5.** Effect of contact time on MB adsorption by polymer gel beads and dry powder beads (initial MB concentration = 5 mg/L; adsorbent dose = 0.02g; pH = 6).

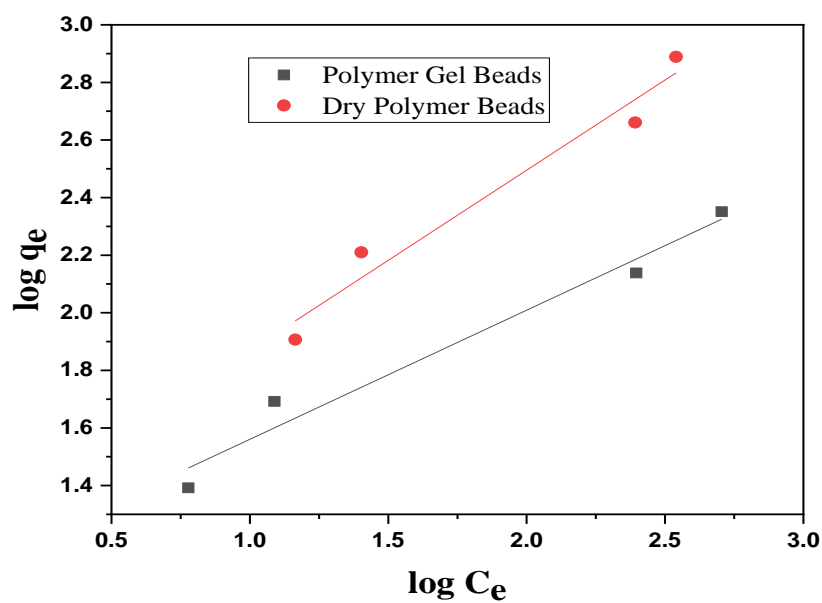

**Figure S6.** Fit of Freundlich isotherm on MB adsorption on  $Fe_3O_4/AC/CD/Alg$  polymer gel beads and dry powder polymer beads.
